# Supplementary material for: Determination of 60 Migrant Substances in Plastic Food Contact Materials by Vortex-Assisted Liquid-Liquid Extraction and GC-Q-Orbitrap HRMS
Source: MDPI journal article supplement (doi:10.3390/molecules26247640), 2021-12-16
Supplement: s1 [file s1]

## SUPPLEMENTARY MATERIAL

### Determination of 60 migrant substances in plastic food contact materials by vortex-assisted liquid-liquid extraction and GC-Q-Orbitrap HRMS

Pablo Miralles <sup>1,2</sup>, Vicent Yusà <sup>1,3</sup>, Yovana Sanchís <sup>1,3</sup>, Clara Coscollà <sup>1,\*</sup>

<sup>1</sup> Foundation for the Promotion of Health and Biomedical Research in the Valencian Region, FISABIO-Public Health, Av. Catalunya 21, 46020 Valencia, Spain

<sup>2</sup> Department of Analytical Chemistry, University of Valencia, Av. Doctor Moliner 50, 46100 Burjassot, Spain

<sup>3</sup> Public Health Laboratory of Valencia, Av. Catalunya 21, 46020 Valencia, Spain

\* Corresponding author.

E-mail address: coscolla\_cla@gva.es (C. Coscollà)

| Tables                                                                                                             | Page |
|--------------------------------------------------------------------------------------------------------------------|------|
| <b>Table S1.</b> Selected ions (m/z) for HRMS acquisition and retention time (RT) of the target analytes.          | 2    |
| <b>Table S2.</b> Extraction efficiencies of the target analytes from the studied food simulants (A, B, C, and D1). | 4    |
| <b>Table S3.</b> Analytical figures of merit of the proposed method using food simulant B.                         | 7    |
| <b>Table S4.</b> Analytical figures of merit of the proposed method using food simulant C.                         | 10   |
| <b>Table S5.</b> Analytical figures of merit of the proposed method using food simulant D1.                        | 13   |

**Table S1.** Selected ions (m/z) for HRMS acquisition and retention time (RT) of the target analytes.

| Analyte                                       | Quantification ion (m/z) | Confirmation ion (m/z) | RT (min) |
|-----------------------------------------------|--------------------------|------------------------|----------|
| 1,4-Butanediol dimethacrylate                 | 69.03349                 | 126.06753              | 28.24    |
| 1,4-Dichlorobenzene                           | 145.96846                | 147.96551              | 13.29    |
| 2,2,4-Trimethyl-1,3-pentanediol diisobutyrate | 71.04914                 | 43.05423               | 29.45    |
| 2-Ethyl-1-hexanol                             | 57.06988                 | 83.08553               | 13.91    |
| 2-Ethylhexyl acrylate                         | 55.05423                 | 70.07770               | 20.10    |
| 3-(4-Isopropylphenyl)-2-methylpropionaldehyde | 133.10118                | 105.06988              | 26.37    |
| 3-(Trimethoxysilyl)propyl methacrylate        | 121.03157                | 91.02103               | 25.53    |
| 4,4'-Difluorobenzophenone                     | 123.02407                | 218.05377              | 29.50    |
| 4-Methylphenol                                | 107.04914                | 108.05697              | 15.40    |
| 4-tert-Butylphenol                            | 135.08044                | 107.04914              | 21.89    |
| Allyl methacrylate                            | 69.03349                 | 111.04409              | 8.22     |
| $\alpha$ -Methylstyrene                       | 118.07770                | 117.06988              | 12.18    |
| $\alpha$ -Pinene                              | 93.06988                 | 91.05423               | 10.44    |
| Benzaldehyde                                  | 105.03349                | 77.03858               | 11.45    |
| Benzophenone                                  | 105.03349                | 182.07262              | 30.37    |
| Benzyl butyl phthalate                        | 149.02332                | 91.05423               | 44.12    |
| Benzyl methacrylate                           | 131.08548                | 91.05423               | 23.01    |
| $\beta$ -Pinene                               | 93.06988                 | 91.05423               | 12.02    |
| Bis(2-ethylhexyl) adipate                     | 129.05462                | 111.04406              | 44.96    |
| Bis(2-ethylhexyl) phthalate                   | 149.02332                | 167.03389              | 47.17    |
| Bis(2-ethylhexyl) phthalate-D <sub>4</sub> *  | 153.04840                | 171.05895              | 47.13    |
| Bis(4-chlorophenyl) sulphone                  | 158.96659                | 285.96188              | 42.37    |
| Butyl acrylate                                | 55.01784                 | 73.02841               | 9.17     |
| Butyl benzoate                                | 105.03349                | 123.04406              | 24.14    |
| Butyl lactate                                 | 45.03349                 | 85.06479               | 13.11    |
| Butyl methacrylate                            | 87.04406                 | 41.03858               | 12.18    |
| Butylated hydroxytoluene                      | 205.15865                | 220.18214              | 27.44    |
| Camphor                                       | 95.08553                 | 108.09335              | 17.67    |
| Cyclohexyl methacrylate                       | 87.04412                 | 67.05423               | 19.42    |
| Diallyl phthalate                             | 149.02332                | 104.02567              | 32.82    |
| Dibutyl adipate                               | 129.05462                | 111.04406              | 33.37    |

|                                        |           |           |       |
|----------------------------------------|-----------|-----------|-------|
| Dibutyl maleate                        | 99.00774  | 117.01826 | 28.15 |
| Dibutyl phthalate                      | 149.02332 | 150.02667 | 37.21 |
| Diethyl phthalate                      | 149.02332 | 176.04680 | 29.40 |
| Diisobutyl phthalate                   | 149.02332 | 104.02567 | 35.32 |
| Dimethyl isophthalate                  | 163.03897 | 135.04406 | 27.56 |
| Dimethyl terephthalate                 | 163.03897 | 135.04405 | 27.26 |
| Diphenyl phthalate                     | 225.05455 | 77.03858  | 47.17 |
| Diphenyl sulfone                       | 125.00561 | 97.01071  | 36.48 |
| Divinyl benzene                        | 130.07770 | 115.05423 | 16.63 |
| Ethyl benzoate                         | 105.03349 | 77.03858  | 18.39 |
| Ethylene glycol dimethacrylate         | 113.05975 | 69.03349  | 22.45 |
| Etocrylene                             | 204.08073 | 232.07567 | 40.95 |
| Isobutyl acrylate                      | 55.01784  | 73.02841  | 7.65  |
| Lauryl acrylate                        | 55.05423  | 83.08553  | 31.85 |
| Methyl benzoate                        | 105.03349 | 77.03858  | 16.00 |
| Methyl dihydrojasmonate                | 83.04914  | 156.07810 | 30.84 |
| Methyl salicylate                      | 120.02058 | 92.02567  | 19.04 |
| Octocrylene                            | 248.07061 | 232.07569 | 48.89 |
| Phenol                                 | 94.04132  | 66.04640  | 12.25 |
| Phenol- <sup>13</sup> C <sub>6</sub> * | 100.06149 | 71.06321  | 12.24 |
| Phenyl methacrylate                    | 134.07262 | 69.03349  | 20.07 |
| Propyl benzoate                        | 105.03349 | 123.04406 | 21.30 |
| Styrene                                | 104.06205 | 78.04640  | 8.87  |
| tert-Butyl methacrylate                | 87.04406  | 57.06988  | 7.65  |
| Tri-n-butyl acetyl citrate             | 129.01819 | 185.08070 | 42.61 |
| Triethoxyvinylsilane                   | 145.06793 | 135.04718 | 11.28 |
| Triethyl citrate                       | 157.04955 | 115.03902 | 30.92 |
| Triethyl phosphite                     | 82.98927  | 111.02060 | 10.25 |
| Trimethylolpropane trimethacrylate     | 69.03349  | 253.14349 | 38.36 |
| Vinyl laurate                          | 183.17429 | 95.08553  | 28.90 |
| Vinyltrimethoxysilane                  | 91.02103  | 121.03157 | 5.49  |

\* Substances used as internal standards.

**Table S2.** Extraction efficiencies of the target analytes from the studied food simulants (A, B, C, and D1).

| Analyte*                                      | Extraction efficiency (%) <sup>a</sup> |                 |                 |                  |
|-----------------------------------------------|----------------------------------------|-----------------|-----------------|------------------|
|                                               | Food simulant A                        | Food simulant B | Food simulant C | Food simulant D1 |
| 1,4-Butanediol dimethacrylate                 | 101 ± 3                                | 90 ± 9          | 100 ± 9         | 73 ± 4           |
| 1,4-Dichlorobenzene                           | 110 ± 2                                | 99 ± 8          | 90 ± 1          | 93 ± 3           |
| 2,2,4-Trimethyl-1,3-pentanediol diisobutyrate | 103 ± 3                                | 105 ± 12        | 104 ± 5         | 100 ± 3          |
| 2-Ethyl-1-hexanol                             | 90 ± 2                                 | 81 ± 8          | 84 ± 2          | 26 ± 1           |
| 2-Ethylhexyl acrylate                         | 80 ± 2                                 | 79 ± 3          | 83 ± 1          | 93 ± 2           |
| 3-(4-Isopropylphenyl)-2-methylpropionaldehyde | 104 ± 5                                | 102 ± 10        | 100 ± 2         | 54 ± 1           |
| 3-(Trimethoxysilyl)propyl methacrylate        | 95 ± 4                                 | -               | 106 ± 5         | 50 ± 2           |
| 4,4'-Difluorobenzophenone                     | 102 ± 5                                | 105 ± 9         | 99 ± 6          | 97 ± 3           |
| 4-Methylphenol                                | 12 ± 2                                 | 14 ± 2          | 11 ± 1          | 8 ± 1            |
| 4-tert-Butylphenol                            | 107 ± 4                                | 104 ± 10        | 82 ± 3          | 16 ± 1           |
| Allyl methacrylate                            | 102 ± 6                                | 98 ± 8          | 90 ± 2          | 69 ± 4           |
| α-Methylstyrene                               | 100 ± 4                                | 104 ± 7         | 96 ± 3          | 104 ± 5          |
| α-Pinene                                      | 88 ± 7                                 | 73 ± 5          | 60 ± 2          | 73 ± 4           |
| Benzaldehyde                                  | 69 ± 5                                 | 52 ± 6          | 47 ± 3          | 16 ± 1           |
| Benzophenone                                  | 103 ± 3                                | 102 ± 8         | 104 ± 4         | 59 ± 2           |
| Benzyl butyl phthalate                        | 101 ± 3                                | 105 ± 9         | 110 ± 4         | 104 ± 5          |
| Benzyl methacrylate                           | 104 ± 4                                | 108 ± 13        | 103 ± 3         | 89 ± 3           |
| β-Pinene                                      | 100 ± 7                                | 85 ± 5          | 73 ± 2          | 87 ± 2           |
| Bis(2-ethylhexyl) adipate                     | 101 ± 4                                | 94 ± 3          | 99 ± 5          | 105 ± 9          |

|                                |         |          |         |         |
|--------------------------------|---------|----------|---------|---------|
| Bis(2-ethylhexyl) phthalate    | 99 ± 7  | 94 ± 9   | 95 ± 7  | 98 ± 11 |
| Bis(4-chlorophenyl) sulphone   | 101 ± 3 | 93 ± 7   | 105 ± 9 | 57 ± 2  |
| Butyl acrylate                 | 84 ± 3  | 77 ± 5   | 74 ± 2  | 60 ± 1  |
| Butyl benzoate                 | 102 ± 5 | 106 ± 12 | 101 ± 3 | 87 ± 2  |
| Butyl lactate                  | 24 ± 2  | 25 ± 4   | 20 ± 3  | -       |
| Butyl methacrylate             | 102 ± 2 | 107 ± 8  | 99 ± 5  | 98 ± 4  |
| Butylated hydroxytoluene       | 104 ± 6 | 109 ± 10 | 102 ± 5 | 94 ± 2  |
| Camphor                        | 100 ± 3 | 99 ± 9   | 97 ± 2  | 57 ± 3  |
| Cyclohexyl methacrylate        | 105 ± 3 | 98 ± 7   | 101 ± 3 | 94 ± 2  |
| Diallyl phthalate              | 100 ± 5 | 102 ± 9  | 95 ± 4  | 49 ± 2  |
| Dibutyl adipate                | 99 ± 3  | 103 ± 8  | 107 ± 7 | 84 ± 6  |
| Dibutyl maleate                | 97 ± 8  | 98 ± 9   | 100 ± 5 | 73 ± 4  |
| Dibutyl phthalate              | 97 ± 4  | 95 ± 2   | 99 ± 9  | 88 ± 4  |
| Diethyl phthalate              | 99 ± 5  | 92 ± 7   | 98 ± 4  | 63 ± 2  |
| Diisobutyl phthalate           | 96 ± 4  | 97 ± 6   | 99 ± 5  | 95 ± 3  |
| Dimethyl isophthalate          | 100 ± 3 | 86 ± 9   | 101 ± 4 | 47 ± 2  |
| Dimethyl terephthalate         | 103 ± 7 | 89 ± 8   | 94 ± 4  | 48 ± 4  |
| Diphenyl phthalate             | 104 ± 9 | 96 ± 9   | 102 ± 5 | 75 ± 5  |
| Diphenyl sulphone              | 99 ± 3  | 93 ± 3   | 98 ± 2  | 31 ± 2  |
| Divinyl benzene                | 104 ± 4 | 89 ± 8   | 101 ± 5 | 105 ± 5 |
| Ethyl benzoate                 | 100 ± 3 | 102 ± 9  | 103 ± 2 | 69 ± 7  |
| Ethylene glycol dimethacrylate | 100 ± 4 | 92 ± 8   | 97 ± 3  | 42 ± 2  |
| Etocrylene                     | 95 ± 3  | 91 ± 4   | 98 ± 9  | 58 ± 3  |

|                                    |         |         |         |        |
|------------------------------------|---------|---------|---------|--------|
| Isobutyl acrylate                  | 85 ± 3  | 76 ± 6  | 72 ± 3  | 59 ± 4 |
| Lauryl acrylate                    | 97 ± 6  | 97 ± 9  | 102 ± 3 | 99 ± 2 |
| Methyl benzoate                    | 98 ± 4  | 88 ± 7  | 85 ± 2  | 48 ± 2 |
| Methyl dihydrojasmonate            | 102 ± 5 | 94 ± 6  | 96 ± 7  | 65 ± 2 |
| Methyl salicylate                  | 99 ± 3  | 101 ± 5 | 97 ± 5  | 79 ± 3 |
| Octocrylene                        | 101 ± 5 | 81 ± 6  | 97 ± 5  | 87 ± 3 |
| Phenol                             | 12 ± 2  | 8 ± 1   | -       | -      |
| Phenyl methacrylate                | 95 ± 5  | 93 ± 4  | 93 ± 5  | 89 ± 2 |
| Propyl benzoate                    | 98 ± 3  | 96 ± 8  | 98 ± 3  | 73 ± 3 |
| Styrene                            | 91 ± 7  | 75 ± 6  | 85 ± 3  | 71 ± 2 |
| tert-Butyl methacrylate            | 102 ± 6 | 95 ± 9  | 81 ± 1  | 79 ± 4 |
| Triethoxyvinylsilane               | 82 ± 8  | -       | 72 ± 4  | 77 ± 2 |
| Triethyl citrate                   | 90 ± 7  | 80 ± 3  | 77 ± 5  | -      |
| Triethyl phosphite                 | 15 ± 1  | -       | -       | 48 ± 2 |
| Trimethylolpropane trimethacrylate | 103 ± 4 | 94 ± 3  | 99 ± 5  | 96 ± 4 |
| Tri-n-butyl acetyl citrate         | 100 ± 5 | 84 ± 6  | 97 ± 3  | -      |
| Vinyl laurate                      | 96 ± 7  | 85 ± 8  | 86 ± 6  | 72 ± 5 |
| Vinyltrimethoxysilane              | 52 ± 5  | -       | 97 ± 2  | 67 ± 3 |

<sup>a</sup> Extraction efficiencies expressed as the mean value of three replicates ± standard deviation.

\* Analytes with no data did not meet the validation criteria of Document No. SANTE/12682/2019 [38].

**Table S3.** Analytical figures of merit of the proposed method in food simulant B.

| Analyte* | Coefficient of | Relative recovery (%) <sup>b</sup> | Precision (RSD, %) <sup>c</sup> |
|----------|----------------|------------------------------------|---------------------------------|
|----------|----------------|------------------------------------|---------------------------------|

|                                               | determination<br>(R <sup>2</sup> ) <sup>a</sup> | 40 µg L <sup>-1</sup> | 160 µg L <sup>-1</sup> | 400 µg L <sup>-1</sup> | 40 µg L <sup>-1</sup> | 160 µg L <sup>-1</sup> | 400 µg L <sup>-1</sup> |
|-----------------------------------------------|-------------------------------------------------|-----------------------|------------------------|------------------------|-----------------------|------------------------|------------------------|
| 1,4-Butanediol dimethacrylate                 | 0.995                                           | 102 ± 4               | 100 ± 8                | 85 ± 4                 | 4.0                   | 7.5                    | 4.6                    |
| 1,4-Dichlorobenzene                           | 0.988                                           | 98 ± 6                | 101 ± 9                | 104 ± 6                | 6.4                   | 9.2                    | 6.2                    |
| 2,2,4-Trimethyl-1,3-pentanediol diisobutyrate | 0.999                                           | 96 ± 7                | 101 ± 8                | 81 ± 3                 | 6.9                   | 8.1                    | 3.9                    |
| 2-Ethyl-1-hexanol                             | 0.999                                           | 89 ± 7                | 96 ± 8                 | 90 ± 5                 | 8.4                   | 8.5                    | 5.2                    |
| 2-Ethylhexyl acrylate                         | 0.996                                           | 89 ± 4                | 100 ± 9                | 93 ± 6                 | 5.0                   | 9.1                    | 5.9                    |
| 3-(4-Isopropylphenyl)-2-methylpropionaldehyde | 0.998                                           | 101 ± 8               | 117 ± 11               | 115 ± 1                | 7.9                   | 9.2                    | 0.9                    |
| 3-(Trimethoxysilyl)propyl methacrylate        | -                                               | -                     | -                      | -                      | -                     | -                      | -                      |
| 4,4'-Difluorobenzophenone                     | 0.997                                           | 105 ± 6               | 104 ± 6                | 114 ± 1                | 6.0                   | 5.5                    | 1.0                    |
| 4-Methylphenol                                | 0.998                                           | 92 ± 4                | 106 ± 8                | 99 ± 5                 | 3.9                   | 7.7                    | 4.7                    |
| 4-tert-Butylphenol                            | 0.996                                           | 96 ± 3                | 100 ± 6                | 104 ± 6                | 3.6                   | 6.5                    | 6.0                    |
| Allyl methacrylate                            | 0.995                                           | 88 ± 9                | 94 ± 8                 | 85 ± 5                 | 10.5                  | 8.2                    | 6.2                    |
| α-Methylstyrene                               | 0.988                                           | 99 ± 6                | 105 ± 6                | 108 ± 2                | 6.3                   | 5.9                    | 1.6                    |
| α-Pinene                                      | 0.988                                           | 94 ± 6                | 99 ± 10                | 96 ± 6                 | 6.0                   | 9.7                    | 6.6                    |
| Benzaldehyde                                  | 0.992                                           | 91 ± 9                | 106 ± 7                | 103 ± 4                | 10.5                  | 6.9                    | 3.5                    |
| Benzophenone                                  | 0.991                                           | 104 ± 6               | 102 ± 5                | 112 ± 1                | 5.8                   | 4.8                    | 1.2                    |
| Benzyl butyl phthalate                        | 0.997                                           | 102 ± 4               | 105 ± 2                | 115 ± 2                | 3.8                   | 1.8                    | 1.6                    |
| Benzyl methacrylate                           | 0.996                                           | 109 ± 7               | 99 ± 6                 | 112 ± 7                | 6.8                   | 6.0                    | 6.7                    |
| β-Pinene                                      | 0.984                                           | 96 ± 5                | 98 ± 9                 | 98 ± 7                 | 4.9                   | 9.6                    | 7.0                    |
| Bis(2-ethylhexyl) adipate                     | 0.996                                           | 108 ± 4               | 107 ± 8                | 110 ± 5                | 3.3                   | 7.3                    | 4.2                    |
| Bis(2-ethylhexyl) phthalate                   | 0.998                                           | 101 ± 5               | 105 ± 6                | 120 ± 4                | 5.1                   | 6.0                    | 3.5                    |

|                                |       |         |          |         |     |      |     |
|--------------------------------|-------|---------|----------|---------|-----|------|-----|
| Bis(4-chlorophenyl) sulphone   | 0.997 | 93 ± 7  | 112 ± 3  | 96 ± 9  | 7.6 | 2.5  | 9.1 |
| Butyl acrylate                 | 0.998 | 96 ± 8  | 97 ± 10  | 90 ± 5  | 8.4 | 9.9  | 5.4 |
| Butyl benzoate                 | 0.996 | 93 ± 7  | 105 ± 3  | 107 ± 2 | 7.4 | 2.9  | 2.3 |
| Butyl lactate                  | 0.986 | 99 ± 2  | 88 ± 4   | 103 ± 4 | 2.4 | 5.1  | 4.3 |
| Butyl methacrylate             | 0.995 | 88 ± 3  | 104 ± 6  | 87 ± 5  | 3.7 | 5.5  | 5.7 |
| Butylated hydroxytoluene       | 0.996 | 99 ± 7  | 99 ± 9   | 104 ± 5 | 7.2 | 8.7  | 5.1 |
| Camphor                        | 0.998 | 89 ± 8  | 105 ± 9  | 97 ± 6  | 9.3 | 8.9  | 5.9 |
| Cyclohexyl methacrylate        | 0.994 | 94 ± 5  | 103 ± 8  | 86 ± 5  | 5.0 | 7.4  | 5.3 |
| Diallyl phthalate              | 0.989 | 109 ± 7 | 108 ± 6  | 111 ± 7 | 6.0 | 5.1  | 5.9 |
| Dibutyl adipate                | 0.997 | 108 ± 7 | 102 ± 4  | 105 ± 5 | 6.2 | 3.5  | 4.7 |
| Dibutyl maleate                | 0.988 | 112 ± 5 | 107 ± 9  | 116 ± 3 | 4.3 | 8.8  | 2.5 |
| Dibutyl phthalate              | 0.993 | 110 ± 6 | 104 ± 6  | 113 ± 7 | 5.2 | 5.7  | 6.1 |
| Diethyl phthalate              | 0.995 | 105 ± 5 | 117 ± 4  | 114 ± 2 | 4.7 | 3.7  | 2.0 |
| Diisobutyl phthalate           | 0.996 | 106 ± 5 | 108 ± 4  | 112 ± 9 | 4.4 | 3.5  | 7.7 |
| Dimethyl isophthalate          | 0.995 | 101 ± 8 | 111 ± 6  | 100 ± 2 | 7.6 | 5.8  | 1.9 |
| Dimethyl terephthalate         | 0.994 | 102 ± 7 | 109 ± 7  | 102 ± 7 | 7.2 | 6.4  | 7.3 |
| Diphenyl phthalate             | 0.994 | 97 ± 5  | 106 ± 5  | 105 ± 1 | 4.9 | 4.6  | 1.4 |
| Diphenyl sulphone              | 0.995 | 106 ± 3 | 103 ± 9  | 111 ± 8 | 2.4 | 8.4  | 7.0 |
| Divinyl benzene                | 0.986 | 99 ± 6  | 107 ± 10 | 107 ± 6 | 6.0 | 9.6  | 6.0 |
| Ethyl benzoate                 | 0.998 | 90 ± 8  | 108 ± 12 | 101 ± 5 | 9.1 | 11.0 | 4.8 |
| Ethylene glycol dimethacrylate | 0.989 | 94 ± 4  | 113 ± 12 | 113 ± 2 | 4.2 | 10.3 | 1.4 |
| Etocrylene                     | 0.991 | 110 ± 3 | 110 ± 6  | 105 ± 7 | 3.0 | 5.7  | 6.8 |
| Isobutyl acrylate              | 0.987 | 91 ± 8  | 102 ± 4  | 86 ± 5  | 8.3 | 3.8  | 5.8 |



|                                    |       |         |          |         |     |      |     |
|------------------------------------|-------|---------|----------|---------|-----|------|-----|
| Lauryl acrylate                    | 0.993 | 106 ± 6 | 100 ± 11 | 96 ± 4  | 5.5 | 11.4 | 3.7 |
| Methyl benzoate                    | 0.999 | 87 ± 3  | 108 ± 10 | 100 ± 6 | 3.4 | 9.2  | 6.3 |
| Methyl dihydrojasmonate            | 0.989 | 109 ± 4 | 98 ± 11  | 109 ± 5 | 3.7 | 11.0 | 4.9 |
| Methyl salicylate                  | 0.997 | 96 ± 5  | 103 ± 7  | 102 ± 1 | 5.5 | 6.7  | 1.0 |
| Octocrylene                        | 0.993 | 111 ± 3 | 113 ± 4  | 103 ± 3 | 2.5 | 3.9  | 3.4 |
| Phenol                             | 0.992 | 101 ± 5 | 103 ± 4  | 101 ± 8 | 4.9 | 4.3  | 7.5 |
| Phenyl methacrylate                | 0.998 | 103 ± 5 | 101 ± 7  | 115 ± 7 | 4.5 | 6.6  | 5.9 |
| Propyl benzoate                    | 0.998 | 98 ± 8  | 105 ± 11 | 102 ± 2 | 8.4 | 10.1 | 1.7 |
| Styrene                            | 0.997 | 92 ± 6  | 105 ± 5  | 103 ± 6 | 6.6 | 5.2  | 6.2 |
| tert-Butyl methacrylate            | 0.996 | 90 ± 7  | 103 ± 9  | 101 ± 6 | 7.9 | 8.7  | 5.9 |
| Triethoxyvinylsilane               | -     | -       | -        | -       | -   | -    | -   |
| Triethyl citrate                   | 0.992 | 100 ± 4 | 92 ± 5   | 106 ± 1 | 4.5 | 5.4  | 0.9 |
| Triethyl phosphite                 | -     | -       | -        | -       | -   | -    | -   |
| Trimethylolpropane trimethacrylate | 0.991 | 104 ± 6 | 91 ± 4   | 85 ± 3  | 5.6 | 4.4  | 3.7 |
| Tri-n-butyl acetyl citrate         | 0.995 | 105 ± 3 | 106 ± 5  | 104 ± 2 | 3.1 | 4.7  | 1.6 |
| Vinyl laurate                      | 0.990 | 108 ± 6 | 103 ± 4  | 108 ± 8 | 5.3 | 3.5  | 7.1 |
| Vinyltrimethoxysilane              | -     | -       | -        | -       | -   | -    | -   |

<sup>a</sup> Coefficient of determination ( $R^2$ ) of the calibration curve in the range 40-400  $\mu\text{g L}^{-1}$ , n=6.

<sup>b</sup> Relative recovery values (%) obtained in the analysis of Sample 2, expressed as the mean value of three replicates  $\pm$  standard deviation.

<sup>c</sup> Precision expressed as relative standard deviation (RSD,%), n=5.

\* Analytes with no data did not meet the validation criteria of Document No. SANTE/12682/2019 [38].

**Table S4.** Analytical figures of merit of the proposed method in food simulant C.

| Analyte*                                      | Coefficient of determination (R <sup>2</sup> ) <sup>a</sup> | Relative recovery (%) <sup>b</sup> |                        |                        | Precision (RSD, %) <sup>c</sup> |                        |                        |
|-----------------------------------------------|-------------------------------------------------------------|------------------------------------|------------------------|------------------------|---------------------------------|------------------------|------------------------|
|                                               |                                                             | 40 µg L <sup>-1</sup>              | 160 µg L <sup>-1</sup> | 400 µg L <sup>-1</sup> | 40 µg L <sup>-1</sup>           | 160 µg L <sup>-1</sup> | 400 µg L <sup>-1</sup> |
| 1,4-Butanediol dimethacrylate                 | 0.990                                                       | 102 ± 1                            | 106 ± 11               | 101 ± 7                | 1.0                             | 10.7                   | 7.2                    |
| 1,4-Dichlorobenzene                           | 0.993                                                       | 106 ± 7                            | 117 ± 5                | 113 ± 12               | 7.0                             | 4.4                    | 10.4                   |
| 2,2,4-Trimethyl-1,3-pentanediol diisobutyrate | 0.994                                                       | 99 ± 1                             | 109 ± 13               | 102 ± 8                | 1.2                             | 12.0                   | 8.4                    |
| 2-Ethyl-1-hexanol                             | 0.997                                                       | 110 ± 8                            | 110 ± 7                | 103 ± 5                | 7.0                             | 6.3                    | 5.0                    |
| 2-Ethylhexyl acrylate                         | 0.997                                                       | 93 ± 4                             | 93 ± 4                 | 103 ± 9                | 4.1                             | 4.8                    | 8.8                    |
| 3-(4-Isopropylphenyl)-2-methylpropionaldehyde | 0.989                                                       | 99 ± 4                             | 105 ± 8                | 99 ± 6                 | 4.1                             | 7.9                    | 5.7                    |
| 3-(Trimethoxysilyl)propyl methacrylate        | 0.989                                                       | 100 ± 3                            | 98 ± 7                 | 107 ± 4                | 3.1                             | 7.1                    | 3.9                    |
| 4,4'-Difluorobenzophenone                     | 0.991                                                       | 104 ± 2                            | 109 ± 12               | 104 ± 6                | 1.6                             | 11.1                   | 6.2                    |
| 4-Methylphenol                                | 0.998                                                       | 102 ± 7                            | 95 ± 3                 | 98 ± 7                 | 6.5                             | 2.9                    | 6.7                    |
| 4-tert-Butylphenol                            | 0.994                                                       | 106 ± 3                            | 98 ± 7                 | 99 ± 9                 | 3.3                             | 6.9                    | 9.0                    |
| Allyl methacrylate                            | 0.997                                                       | 113 ± 3                            | 101 ± 6                | 106 ± 1                | 2.4                             | 5.5                    | 1.1                    |
| α-Methylstyrene                               | 0.997                                                       | 109 ± 5                            | 114 ± 7                | 108 ± 9                | 4.3                             | 6.0                    | 8.1                    |
| α-Pinene                                      | 0.995                                                       | 98 ± 2                             | 106 ± 8                | 99 ± 8                 | 2.0                             | 7.8                    | 8.4                    |
| Benzaldehyde                                  | 0.998                                                       | 112 ± 4                            | 105 ± 5                | 102 ± 4                | 3.4                             | 4.9                    | 3.7                    |
| Benzophenone                                  | 0.992                                                       | 99 ± 1                             | 108 ± 8                | 103 ± 7                | 1.2                             | 7.5                    | 6.8                    |
| Benzyl butyl phthalate                        | 0.989                                                       | 106 ± 2                            | 92 ± 5                 | 99 ± 7                 | 2.2                             | 4.9                    | 6.8                    |
| Benzyl methacrylate                           | 0.982                                                       | 97 ± 3                             | 96 ± 9                 | 103 ± 12               | 3.4                             | 9.8                    | 11.9                   |
| β-Pinene                                      | 0.994                                                       | 101 ± 3                            | 112 ± 7                | 101 ± 10               | 3.1                             | 6.6                    | 10.3                   |

|                                |       |         |          |          |     |      |      |
|--------------------------------|-------|---------|----------|----------|-----|------|------|
| Bis(2-ethylhexyl) adipate      | 0.991 | 99 ± 1  | 85 ± 4   | 89 ± 5   | 1.5 | 4.4  | 5.6  |
| Bis(2-ethylhexyl) phthalate    | 0.991 | 101 ± 2 | 89 ± 4   | 93 ± 5   | 2.2 | 4.2  | 5.9  |
| Bis(4-chlorophenyl) sulphone   | 0.989 | 98 ± 3  | 91 ± 3   | 95 ± 3   | 2.9 | 2.9  | 3.0  |
| Butyl acrylate                 | 0.996 | 93 ± 8  | 96 ± 2   | 101 ± 5  | 8.6 | 2.1  | 4.5  |
| Butyl benzoate                 | 0.990 | 101 ± 5 | 102 ± 9  | 101 ± 7  | 5.1 | 9.2  | 6.5  |
| Butyl lactate                  | 0.990 | 94 ± 5  | 107 ± 4  | 105 ± 3  | 5.3 | 3.7  | 2.8  |
| Butyl methacrylate             | 0.995 | 113 ± 2 | 110 ± 7  | 102 ± 6  | 1.9 | 6.3  | 6.2  |
| Butylated hydroxytoluene       | 0.983 | 107 ± 1 | 107 ± 7  | 101 ± 9  | 0.9 | 6.5  | 8.5  |
| Camphor                        | 0.987 | 100 ± 3 | 106 ± 10 | 95 ± 11  | 2.9 | 9.2  | 11.2 |
| Cyclohexyl methacrylate        | 0.992 | 94 ± 7  | 94 ± 8   | 91 ± 7   | 7.0 | 8.8  | 8.1  |
| Diallyl phthalate              | 0.996 | 96 ± 2  | 106 ± 10 | 102 ± 2  | 1.9 | 9.3  | 2.2  |
| Dibutyl adipate                | 0.992 | 100 ± 3 | 99 ± 10  | 95 ± 3   | 2.6 | 10.0 | 2.8  |
| Dibutyl maleate                | 0.990 | 96 ± 2  | 105 ± 10 | 112 ± 5  | 1.7 | 9.4  | 4.4  |
| Dibutyl phthalate              | 0.984 | 103 ± 3 | 98 ± 8   | 101 ± 3  | 3.2 | 8.7  | 3.1  |
| Diethyl phthalate              | 0.990 | 103 ± 2 | 101 ± 10 | 103 ± 6  | 2.2 | 10.1 | 5.9  |
| Diisobutyl phthalate           | 0.993 | 98 ± 4  | 97 ± 6   | 101 ± 4  | 4.6 | 6.5  | 3.5  |
| Dimethyl isophthalate          | 0.990 | 99 ± 1  | 109 ± 6  | 102 ± 7  | 1.1 | 5.2  | 7.1  |
| Dimethyl terephthalate         | 0.987 | 100 ± 2 | 101 ± 9  | 106 ± 3  | 1.6 | 9.4  | 3.3  |
| Diphenyl phthalate             | 0.983 | 103 ± 2 | 85 ± 2   | 91 ± 6   | 1.5 | 2.0  | 6.3  |
| Diphenyl sulphone              | 0.994 | 93 ± 6  | 105 ± 11 | 101 ± 3  | 6.1 | 10.1 | 2.9  |
| Divinyl benzene                | 0.999 | 93 ± 7  | 101 ± 4  | 100 ± 6  | 7.2 | 3.5  | 6.5  |
| Ethyl benzoate                 | 0.994 | 87 ± 2  | 103 ± 13 | 100 ± 12 | 2.3 | 12.2 | 11.6 |
| Ethylene glycol dimethacrylate | 0.993 | 93 ± 9  | 92 ± 10  | 99 ± 9   | 9.9 | 10.5 | 9.3  |

|                                    |       |         |          |         |     |      |     |
|------------------------------------|-------|---------|----------|---------|-----|------|-----|
| Etocrylene                         | 0.989 | 102 ± 3 | 91 ± 2   | 100 ± 5 | 3.2 | 2.5  | 4.5 |
| Isobutyl acrylate                  | 0.994 | 120 ± 6 | 101 ± 8  | 102 ± 7 | 4.9 | 7.4  | 6.7 |
| Lauryl acrylate                    | 0.987 | 103 ± 7 | 117 ± 3  | 100 ± 4 | 7.0 | 2.9  | 4.3 |
| Methyl benzoate                    | 0.997 | 110 ± 7 | 100 ± 8  | 106 ± 8 | 6.3 | 7.9  | 8.0 |
| Methyl dihydrojasmonate            | 0.990 | 100 ± 5 | 94 ± 7   | 102 ± 4 | 5.0 | 6.7  | 3.7 |
| Methyl salicylate                  | 0.994 | 89 ± 5  | 109 ± 9  | 86 ± 7  | 5.6 | 8.6  | 7.7 |
| Octocrylene                        | 0.987 | 106 ± 1 | 82 ± 2   | 90 ± 5  | 1.0 | 2.8  | 5.3 |
| Phenol                             | -     | -       | -        | -       | -   | -    | -   |
| Phenyl methacrylate                | 0.990 | 94 ± 4  | 104 ± 13 | 98 ± 9  | 4.1 | 12.6 | 8.9 |
| Propyl benzoate                    | 0.992 | 93 ± 5  | 99 ± 12  | 96 ± 9  | 5.9 | 12.2 | 9.6 |
| Styrene                            | 0.992 | 93 ± 1  | 100 ± 5  | 98 ± 5  | 1.5 | 4.9  | 5.2 |
| tert-Butyl methacrylate            | 0.993 | 107 ± 6 | 97 ± 9   | 108 ± 4 | 5.4 | 8.8  | 3.7 |
| Triethoxyvinylsilane               | 0.995 | 118 ± 5 | 100 ± 6  | 96 ± 7  | 4.5 | 5.6  | 7.2 |
| Triethyl citrate                   | 0.990 | 104 ± 5 | 101 ± 5  | 88 ± 6  | 5.3 | 4.8  | 6.8 |
| Triethyl phosphite                 | -     | -       | -        | -       | -   | -    | -   |
| Trimethylolpropane trimethacrylate | 0.989 | 106 ± 1 | 90 ± 6   | 92 ± 3  | 1.1 | 6.2  | 2.8 |
| Tri-n-butyl acetyl citrate         | 0.997 | 113 ± 5 | 86 ± 6   | 98 ± 3  | 4.3 | 6.7  | 3.6 |
| Vinyl laurate                      | 0.980 | 115 ± 1 | 100 ± 8  | 107 ± 6 | 1.1 | 8.1  | 5.3 |
| Vinyltrimethoxysilane              | 0.997 | 98 ± 5  | 93 ± 8   | 99 ± 6  | 5.1 | 8.6  | 6.1 |

<sup>a</sup> Coefficient of determination ( $R^2$ ) of the calibration curve in the range 40-400  $\mu\text{g L}^{-1}$ , n=6.

<sup>b</sup> Relative recovery values (%) obtained in the analysis of Sample 3, expressed as the mean value of three replicates  $\pm$  standard deviation.

<sup>c</sup> Precision expressed as relative standard deviation (RSD,%), n=5.

\* Analytes with no data did not meet the validation criteria of Document No. SANTE/12682/2019 [38].

**Table S5.** Analytical figures of merit of the proposed method in food simulant D1.

| Analyte*                                      | Coefficient of determination (R <sup>2</sup> ) <sup>a</sup> | Relative recovery (%) <sup>b</sup> |                        |                        | Precision (RSD, %) <sup>c</sup> |                        |                        |
|-----------------------------------------------|-------------------------------------------------------------|------------------------------------|------------------------|------------------------|---------------------------------|------------------------|------------------------|
|                                               |                                                             | 40 µg L <sup>-1</sup>              | 160 µg L <sup>-1</sup> | 400 µg L <sup>-1</sup> | 40 µg L <sup>-1</sup>           | 160 µg L <sup>-1</sup> | 400 µg L <sup>-1</sup> |
| 1,4-Butanediol dimethacrylate                 | 0.995                                                       | 93 ± 2                             | 82 ± 6                 | 95 ± 5                 | 2.1                             | 6.7                    | 5.1                    |
| 1,4-Dichlorobenzene                           | 0.990                                                       | 104 ± 7                            | 116 ± 1                | 108 ± 4                | 6.3                             | 1.1                    | 3.4                    |
| 2,2,4-Trimethyl-1,3-pentanediol diisobutyrate | 0.996                                                       | 99 ± 4                             | 103 ± 2                | 105 ± 3                | 3.8                             | 2.2                    | 3.2                    |
| 2-Ethyl-1-hexanol                             | 0.997                                                       | 103 ± 2                            | 91 ± 1                 | 110 ± 3                | 1.9                             | 1.3                    | 2.4                    |
| 2-Ethylhexyl acrylate                         | 0.992                                                       | 94 ± 4                             | 112 ± 2                | 101 ± 3                | 3.9                             | 1.9                    | 3.1                    |
| 3-(4-Isopropylphenyl)-2-methylpropionaldehyde | 0.996                                                       | 89 ± 2                             | 97 ± 2                 | 106 ± 5                | 1.9                             | 1.7                    | 4.5                    |
| 3-(Trimethoxysilyl)propyl methacrylate        | 0.995                                                       | 86 ± 6                             | 84 ± 7                 | 91 ± 4                 | 7.5                             | 8.5                    | 4.6                    |
| 4,4'-Difluorobenzophenone                     | 0.995                                                       | 96 ± 5                             | 101 ± 2                | 102 ± 4                | 4.9                             | 1.6                    | 3.9                    |
| 4-Methylphenol                                | 0.992                                                       | 97 ± 5                             | 87 ± 9                 | 94 ± 3                 | 4.8                             | 9.9                    | 3.3                    |
| 4-tert-Butylphenol                            | 0.993                                                       | 88 ± 9                             | 90 ± 2                 | 98 ± 4                 | 10.1                            | 2.0                    | 3.9                    |
| Allyl methacrylate                            | 0.995                                                       | 104 ± 7                            | 109 ± 2                | 100 ± 4                | 6.9                             | 2.1                    | 3.6                    |
| α-Methylstyrene                               | 0.994                                                       | 98 ± 6                             | 114 ± 1                | 107 ± 4                | 6.2                             | 1.3                    | 3.6                    |
| α-Pinene                                      | 0.994                                                       | 112 ± 5                            | 117 ± 2                | 109 ± 4                | 4.1                             | 1.6                    | 3.5                    |
| Benzaldehyde                                  | 0.991                                                       | 100 ± 8                            | 117 ± 2                | 107 ± 6                | 7.6                             | 1.8                    | 5.1                    |
| Benzophenone                                  | 0.997                                                       | 102 ± 1                            | 96 ± 1                 | 100 ± 4                | 1.0                             | 1.2                    | 3.6                    |
| Benzyl butyl phthalate                        | 0.987                                                       | 90 ± 1                             | 84 ± 4                 | 93 ± 5                 | 1.5                             | 4.7                    | 5.3                    |
| Benzyl methacrylate                           | 0.996                                                       | 92 ± 4                             | 95 ± 2                 | 101 ± 4                | 3.9                             | 1.8                    | 4.3                    |
| β-Pinene                                      | 0.994                                                       | 109 ± 8                            | 115 ± 2                | 109 ± 4                | 7.3                             | 1.7                    | 3.6                    |

|                                |       |         |         |         |      |      |     |
|--------------------------------|-------|---------|---------|---------|------|------|-----|
| Bis(2-ethylhexyl) adipate      | 0.983 | 88 ± 2  | 87 ± 4  | 90 ± 6  | 2.7  | 4.8  | 7.0 |
| Bis(2-ethylhexyl) phthalate    | 0.997 | 97 ± 2  | 99 ± 7  | 102 ± 2 | 2.3  | 7.4  | 2.1 |
| Bis(4-chlorophenyl) sulphone   | 0.996 | 86 ± 9  | 82 ± 9  | 93 ± 3  | 10.2 | 11.4 | 3.1 |
| Butyl acrylate                 | 0.989 | 92 ± 6  | 112 ± 2 | 106 ± 3 | 6.8  | 1.8  | 2.8 |
| Butyl benzoate                 | 0.995 | 104 ± 5 | 106 ± 2 | 104 ± 4 | 5.0  | 1.4  | 3.8 |
| Butyl lactate                  | -     | -       | -       | -       | -    | -    | -   |
| Butyl methacrylate             | 0.991 | 104 ± 5 | 114 ± 1 | 107 ± 4 | 4.4  | 0.9  | 3.4 |
| Butylated hydroxytoluene       | 0.992 | 108 ± 4 | 89 ± 1  | 97 ± 5  | 3.2  | 1.4  | 4.8 |
| Camphor                        | 0.991 | 99 ± 5  | 110 ± 2 | 106 ± 4 | 4.9  | 1.4  | 3.8 |
| Cyclohexyl methacrylate        | 0.996 | 100 ± 4 | 107 ± 2 | 106 ± 4 | 4.4  | 1.5  | 3.6 |
| Diallyl phthalate              | 0.997 | 92 ± 4  | 108 ± 1 | 99 ± 5  | 4.3  | 1.2  | 4.8 |
| Dibutyl adipate                | 0.991 | 94 ± 2  | 88 ± 4  | 89 ± 4  | 2.0  | 4.9  | 4.8 |
| Dibutyl maleate                | 0.992 | 94 ± 2  | 83 ± 6  | 91 ± 5  | 2.4  | 6.9  | 5.4 |
| Dibutyl phthalate              | 0.996 | 94 ± 3  | 83 ± 5  | 95 ± 5  | 3.5  | 6.2  | 5.3 |
| Diethyl phthalate              | 0.999 | 98 ± 3  | 97 ± 5  | 101 ± 2 | 2.9  | 5.4  | 2.0 |
| Diisobutyl phthalate           | 0.996 | 93 ± 2  | 86 ± 2  | 98 ± 4  | 2.4  | 2.1  | 4.4 |
| Dimethyl isophthalate          | 0.996 | 85 ± 2  | 92 ± 1  | 98 ± 5  | 2.9  | 1.1  | 4.9 |
| Dimethyl terephthalate         | 0.994 | 82 ± 3  | 89 ± 1  | 94 ± 4  | 4.1  | 1.4  | 4.8 |
| Diphenyl phthalate             | 0.980 | 88 ± 8  | 107 ± 9 | 96 ± 9  | 9.1  | 8.4  | 9.4 |
| Diphenyl sulphone              | 0.993 | 86 ± 5  | 89 ± 1  | 94 ± 4  | 5.9  | 1.1  | 4.8 |
| Divinyl benzene                | 0.995 | 97 ± 4  | 105 ± 2 | 105 ± 4 | 3.9  | 1.6  | 3.5 |
| Ethyl benzoate                 | 0.996 | 104 ± 6 | 110 ± 1 | 107 ± 4 | 5.9  | 0.9  | 4.0 |
| Ethylene glycol dimethacrylate | 0.995 | 87 ± 4  | 90 ± 6  | 96 ± 5  | 5.1  | 6.2  | 5.6 |

|                                    |       |         |         |         |      |      |     |
|------------------------------------|-------|---------|---------|---------|------|------|-----|
| Etocrylene                         | 0.995 | 86 ± 1  | 87 ± 3  | 95 ± 6  | 1.2  | 3.8  | 6.3 |
| Isobutyl acrylate                  | 0.984 | 92 ± 6  | 117 ± 2 | 108 ± 4 | 6.6  | 1.3  | 3.3 |
| Lauryl acrylate                    | 0.992 | 95 ± 3  | 82 ± 5  | 97 ± 5  | 2.8  | 6.1  | 5.1 |
| Methyl benzoate                    | 0.987 | 95 ± 6  | 108 ± 3 | 108 ± 4 | 6.8  | 2.9  | 3.7 |
| Methyl dihydrojasmonate            | 0.995 | 93 ± 5  | 86 ± 4  | 95 ± 5  | 5.8  | 5.1  | 5.2 |
| Methyl salicylate                  | 0.995 | 88 ± 8  | 86 ± 5  | 97 ± 5  | 9.4  | 5.4  | 5.1 |
| Octocrylene                        | 0.982 | 101 ± 1 | 86 ± 6  | 88 ± 7  | 1.1  | 6.6  | 7.7 |
| Phenol                             | -     | -       | -       | -       | -    | -    | -   |
| Phenyl methacrylate                | 0.994 | 92 ± 3  | 101 ± 2 | 105 ± 4 | 3.2  | 1.5  | 3.6 |
| Propyl benzoate                    | 0.990 | 95 ± 5  | 109 ± 1 | 106 ± 4 | 5.6  | 1.3  | 3.7 |
| Styrene                            | 0.991 | 100 ± 7 | 114 ± 2 | 107 ± 4 | 6.7  | 1.4  | 3.7 |
| tert-Butyl methacrylate            | 0.986 | 98 ± 7  | 116 ± 1 | 107 ± 4 | 7.6  | 0.9  | 3.3 |
| Triethoxyvinylsilane               | 0.990 | 96 ± 8  | 109 ± 1 | 104 ± 4 | 8.0  | 0.9  | 3.6 |
| Triethyl citrate                   | -     | -       | -       | -       | -    | -    | -   |
| Triethyl phosphite                 | 0.993 | 88 ± 3  | 94 ± 1  | 91 ± 3  | 3.7  | 1.1  | 3.8 |
| Trimethylolpropane trimethacrylate | 0.994 | 86 ± 3  | 87 ± 3  | 90 ± 6  | 3.6  | 3.2  | 6.3 |
| Tri-n-butyl acetyl citrate         | -     | -       | -       | -       | -    | -    | -   |
| Vinyl laurate                      | 0.995 | 86 ± 1  | 82 ± 9  | 94 ± 5  | 1.6  | 10.6 | 4.8 |
| Vinyltrimethoxysilane              | 0.981 | 87 ± 9  | 94 ± 6  | 95 ± 7  | 10.3 | 6.4  | 7.4 |

<sup>a</sup> Coefficient of determination ( $R^2$ ) of the calibration curve in the range 40-400  $\mu\text{g L}^{-1}$ , n=6.

<sup>b</sup> Relative recovery values (%) obtained in the analysis of Sample 4, expressed as the mean value of three replicates  $\pm$  standard deviation.

<sup>c</sup> Precision expressed as relative standard deviation (RSD,%), n=5.

\* Analytes with no data did not meet the validation criteria of Document No. SANTE/12682/2019 [38].
